# Supplementary material for: Genomic Analysis and Antimicrobial Components of M7, an Aspergillus terreus Strain Derived from the South China Sea
Source: MDPI journal article supplement (doi:10.3390/jof8101051), 2022-10-07
Supplement: s1 [file s1]

## Supplementary Information

**Table S1.** NMR data of compound 1 (500 MHz for  $^1\text{H}$  NMR, 125 MHz for  $^{13}\text{C}$  NMR,  $\text{CD}_3\text{OD}$ ).

| No. | $^{13}\text{C}$ ( $\delta$ ) | $^1\text{H}$ ( $\delta$ ) |
|-----|------------------------------|---------------------------|
| 5   | 163.01                       |                           |
| 6   | 66.45                        | 4.20 (2H, d)              |
| 7   | 36.95                        | 2.27(2H, m)               |
| 8   | 14.14                        | 1.03(6H, d)               |
| 9   | 26.12                        | 1.73(2H, m), 1.55(2H, m)  |
| 10  | 11.15                        | 1.01(6H, t)               |

**Table S2.** NMR data of compound 2 (500 MHz for  $^1\text{H}$  NMR, 125 MHz for  $^{13}\text{C}$  NMR,  $\text{CD}_3\text{OD}$ ).

| No. | $^{13}\text{C}$ ( $\delta$ ) | $^1\text{H}$ ( $\delta$ ) |
|-----|------------------------------|---------------------------|
| 2   | 162.86                       |                           |
| 3   | 67.81                        | 4.11(1H,dd)               |
| 5   | 163.06                       |                           |
| 6   | 66.51                        | 4.21(1H,dd)               |
| 7   | 36.97                        | 2.26(1H,br m)             |
| 8   | 14.13                        | 1.04(3H,d)                |
| 9   | 26.09                        | 1.55(1H,m), 1.75(1H,m),   |
| 10  | 11.11                        | 1.00(3H,t)                |
| 11  | 30.81                        | 2.54(1H,br m)             |
| 12  | 17.80                        | 1.11(3H,d)                |
| 13  | 18.19                        | 1.18(3H,d)                |

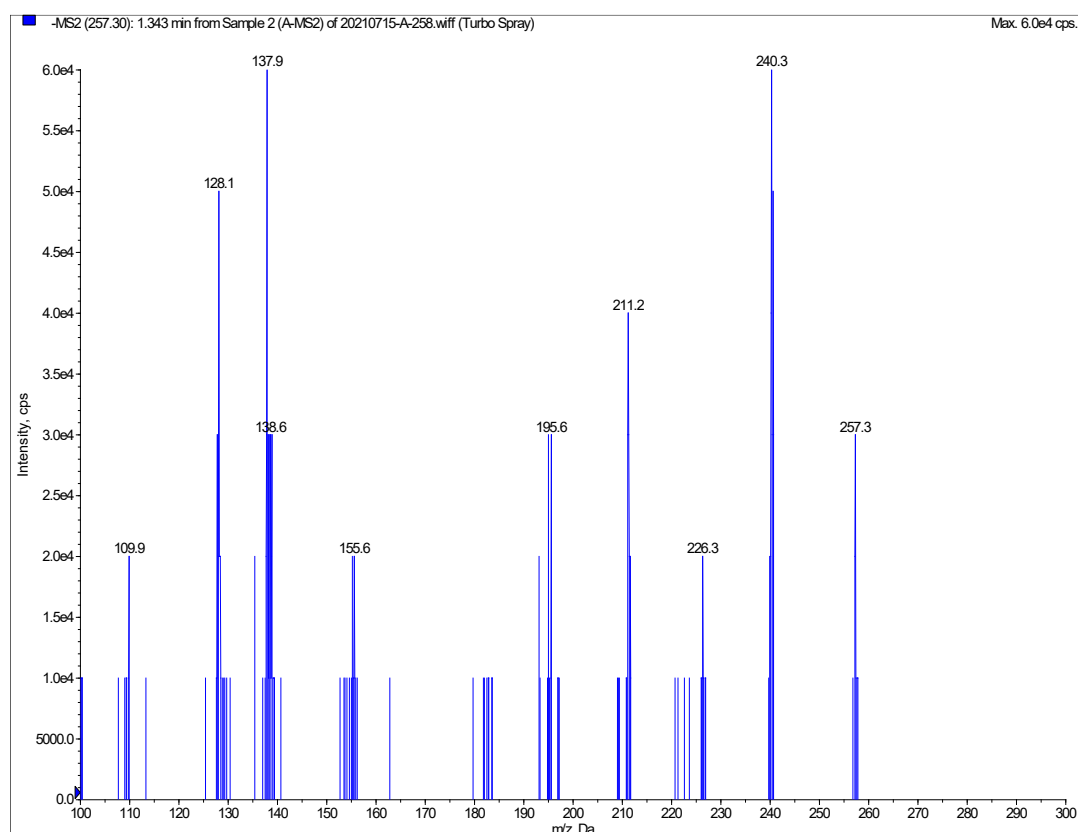

**Figure S1.** Low resolution mass spectrometry of compound 1.

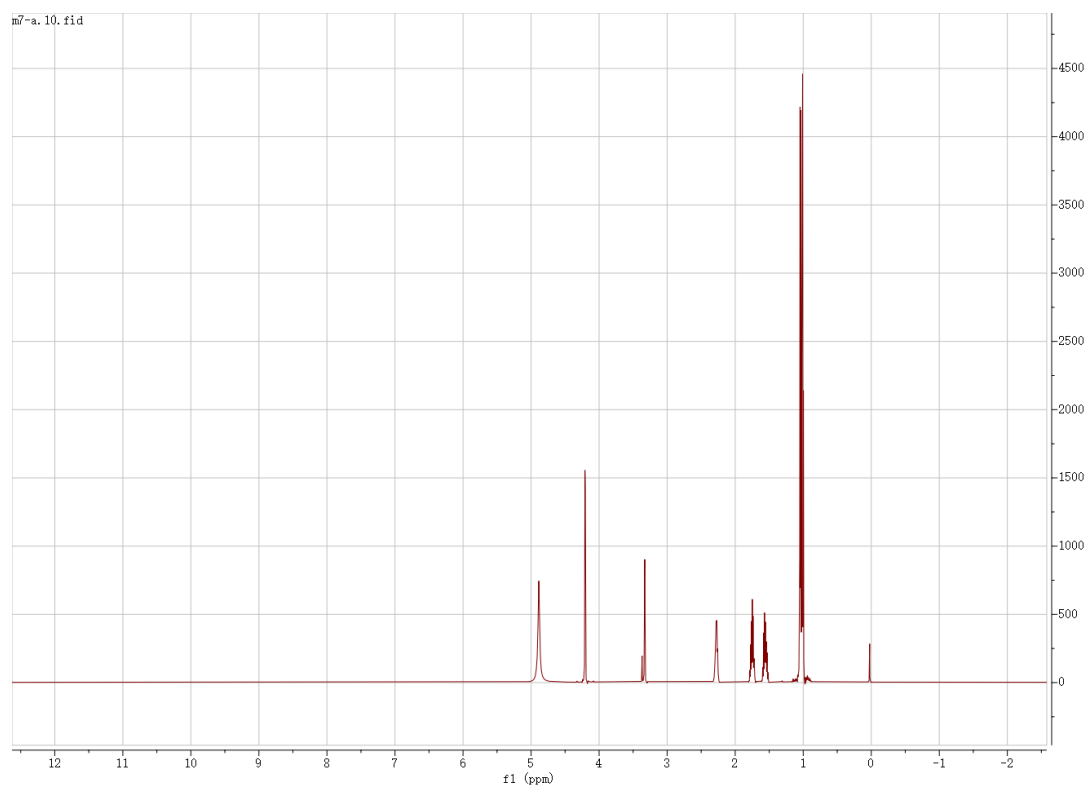

Figure S2. <sup>1</sup>H-NMR spectra of compound 1.

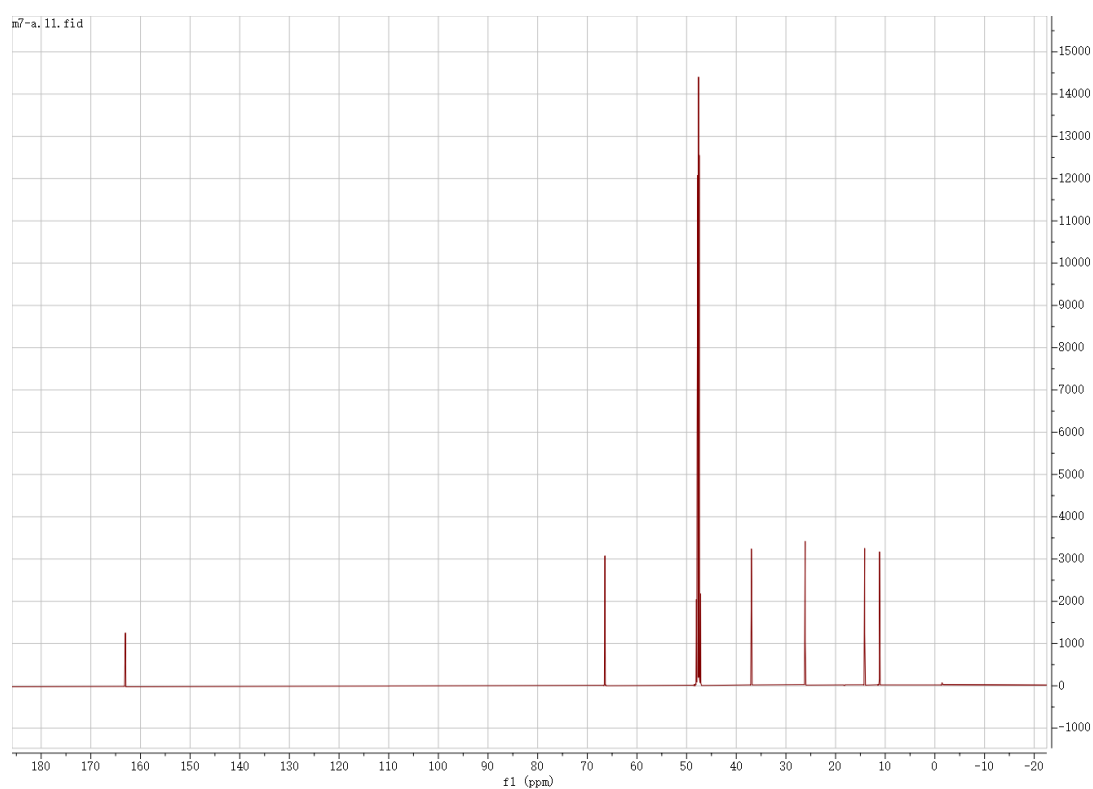

Figure S3. <sup>13</sup>C-NMR spectra of compound 1.

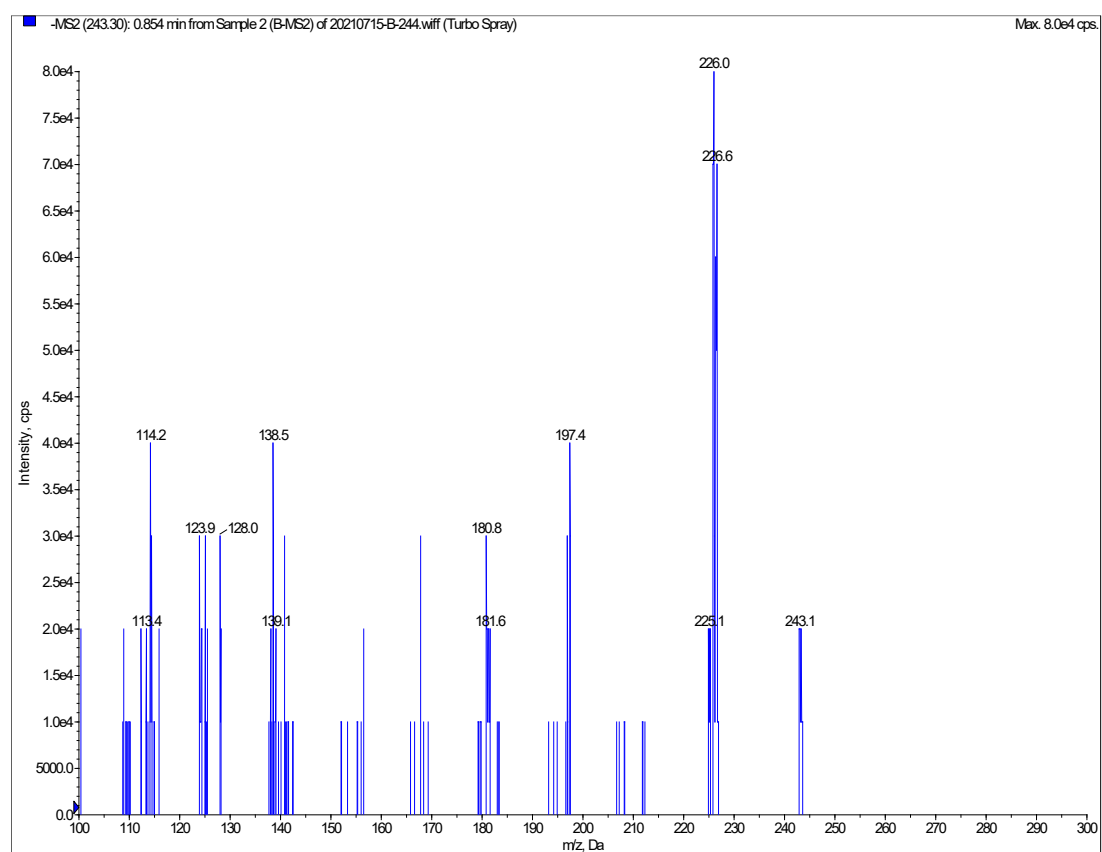

Figure S4. Low resolution mass spectrometry of compound 2.

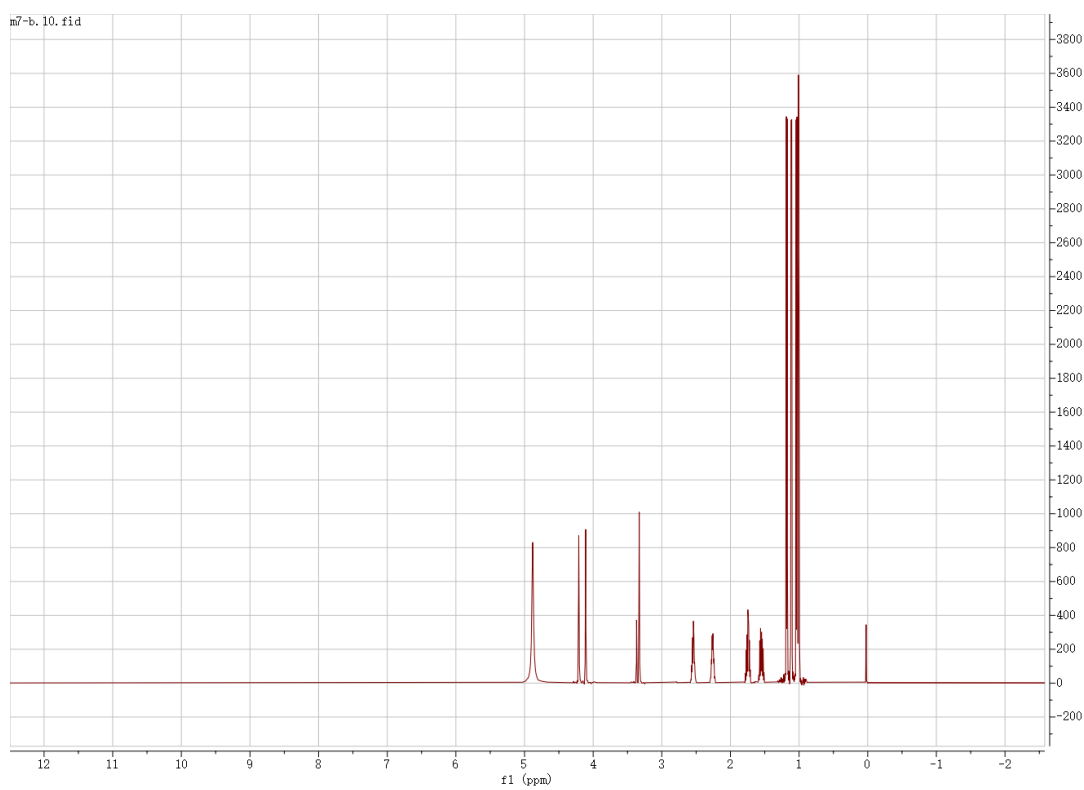

Figure S5. <sup>1</sup>H-NMR spectra of compound 2.

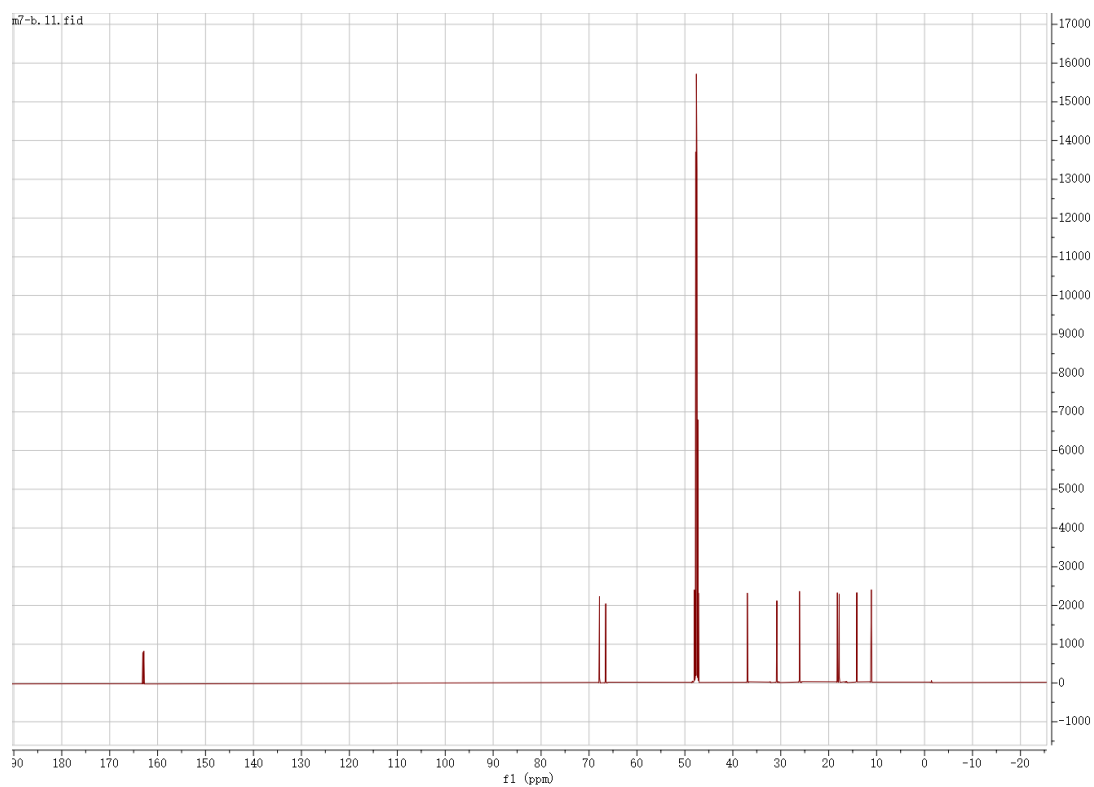

**Figure S6.**  $^{13}\text{C}$ -NMR spectra of compound 2.
